# Supplementary material
Source: PubMed Central journal article supplement (PMC8142739)
Supplement: mmc1.pdf [file mmc1.pdf]

## Supplemental Appendix.

Table S1. Age Category by Gender and Race-Ethnicity of American College of Physicians Online Panel, Study Sample before Weighting and Sample after Post-Stratification Weighting

|                              | <u>ACP Online Panel</u> |                  | <u>Sample, before weighting</u> |                  | <u>Sample, after weighting</u> |                  |
|------------------------------|-------------------------|------------------|---------------------------------|------------------|--------------------------------|------------------|
|                              | 25-44 yrs.              | 45+ yrs.         | 25-44 yrs.                      | 45+ yrs.         | 25-44 yrs.                     | 45+ yrs.         |
|                              | Percent of total        | Percent of total | Percent of total                | Percent of total | Percent of total               | Percent of total |
| Gender                       |                         |                  |                                 |                  |                                |                  |
| Male                         | 30.3                    | 29.9             | 25.5                            | 39.8             | 30.8                           | 29.0             |
| Female                       | 25.1                    | 15.7             | 16.8                            | 17.8             | 24.5                           | 15.7             |
| Race/ethnicity               |                         |                  |                                 |                  |                                |                  |
| African-American, not Latinx | 3.2                     | 2.2              | 1.6                             | 1.7              | 3.2                            | 2.2              |
| Asian, not Latinx            | 21.5                    | 9.3              | 16.9                            | 11.2             | 21.5                           | 9.3              |
| Latinx                       | 4.3                     | 2.1              | 2.0                             | 2.4              | 4.3                            | 2.1              |
| Other, not Latinx            | 5.0                     | 2.0              | 5.0                             | 6.4              | 5.0                            | 2.0              |
| White, not Latinx            | 21.2                    | 29.1             | 16.7                            | 36.1             | 21.3                           | 29.2             |

Table S2. Participant characteristics (N = 810)

| Characteristic                                                              | N (weighted % or weighted mean) |
|-----------------------------------------------------------------------------|---------------------------------|
| Age group, %                                                                |                                 |
| 25 – 34 years                                                               | 90 (14.1)                       |
| 35 – 44 years                                                               | 251 (41.3)                      |
| 45 – 54 years                                                               | 196 (18.7)                      |
| 55 - 64                                                                     | 175 (17.1)                      |
| ≥ 65 years                                                                  | 93 (8.8)                        |
| Female gender, %                                                            | 271 (40.2)                      |
| Race / ethnicity, %                                                         |                                 |
| White, not Latinx                                                           | 425 (50.3)                      |
| Asian, not Latinx                                                           | 227 (30.8)                      |
| Other and multi-racial, not Latinx                                          | 93 (7.2)                        |
| Latinx                                                                      | 35 (6.3)                        |
| African-American, not Latinx                                                | 27 (5.4)                        |
| Subspecialty, %                                                             |                                 |
| General Internal Medicine                                                   | 394 (45.2)                      |
| Specialty at high risk for exposure to COVID-19                             | 217 (29.1)                      |
| All other subspecialties <sup>‡</sup>                                       | 199 (25.7)                      |
| Health care setting, %                                                      |                                 |
| Hospital, not affiliated with a medical school                              | 152 (20.2)                      |
| Hospital, affiliated with a medical school                                  | 188 (25.0)                      |
| Outpatient multi-specialty practice, not affiliated with a medical school   | 104 (12.1)                      |
| Outpatient Internal Medicine practice, not affiliated with a medical school | 187 (20.6)                      |
| Outpatient practice, affiliated with a medical school                       | 107 (13.3)                      |
| Setting devoted to care for medically underserved                           | 38 (5.0)                        |
| Other                                                                       | 34 (3.8)                        |
| Location of clinical care %                                                 |                                 |
| Only outpatient setting                                                     | 348 (40.7)                      |
| Outpatient and inpatient settings                                           | 286 (35.4)                      |
| Only inpatient setting                                                      | 176 (23.9)                      |
| Hours of clinical care per week, mean                                       |                                 |
| Outpatient care                                                             | 20.8                            |
| Inpatient care                                                              | 21.3                            |
| Telemedicine                                                                | 4.7                             |
| Other (phone, other)                                                        | 4.7                             |
| Number of patients with COVID-19, past two weeks, mean                      |                                 |
| Face-to-face                                                                | 7.4                             |
| Telephone, Telemedicine, Electronic record messaging                        | 4.9                             |

\*Column percentages may not add to 100 because percentages were calculated based on non-missing values.

<sup>†</sup>Infectious Disease; Pulmonary Medicine; Critical Care Medicine; Emergency Medicine.

<sup>‡</sup>Allergy and Immunology; Cardiology; Endocrinology, Diabetes and Metabolism; Gastroenterology; Hematology; Medicine/Pediatrics; Nephrology; Oncology; Rheumatology; Geriatrics; Palliative Medicine; Addiction Medicine.
